# Supplementary material for: Recombination hotspots in an extended human pseudoautosomal domain predicted from double-strand break maps and characterized by sperm-based crossover analysis
Source: PubMed Central journal article supplement (PMC6193736; doi:10.1371/journal.pgen.1007680), 2018-10-08
Supplement: pgen.1007680.s004.pdf [file pgen.1007680.s004.pdf]

S1\_Table. Summary statistics for Ion Torrent sequencing across the ePAR

| individual |        |             | bases              | >=Q20<br>bases     | >=Q20<br>bases, % | reads          | mapped<br>reads | % of reads<br>mapped |
|------------|--------|-------------|--------------------|--------------------|-------------------|----------------|-----------------|----------------------|
| NA10847    | female | da          | 43,979,848         | 39,307,954         | 89.38             | 193,337        | 179,808         | 93.00                |
| NA12146    | ePAR   | fa          | 71,728,327         | 64,684,810         | 90.18             | 290,574        | 271,962         | 93.59                |
| NA12239    | female | mo          | 86,728,887         | 77,742,730         | 89.64             | 359,398        | 334,770         | 93.15                |
| man 20     | ePAR   |             | 78,320,031         | 70,679,322         | 90.24             | 316,557        | 306,178         | 96.72                |
| man 53     | ePAR   |             | 72,216,306         | 65,159,010         | 90.23             | 284,570        | 279,360         | 98.17                |
| B1 *       | ePAR   | br          | 66,763,804         | 59,929,318         | 89.76             | 264,729        | 232,026         | 87.65                |
| P1 *       | ePAR   | pa          | 66,218,114         | 59,721,814         | 90.19             | 262,450        | 235,900         | 89.88                |
| F1 *       | ePAR   | fa          | 80,785,440         | 72,804,184         | 90.12             | 336,278        | 307,895         | 91.56                |
| P2 *       | ePAR   | pa          | 78,977,048         | 70,732,103         | 89.56             | 325,234        | 310,205         | 95.38                |
| F2 *       | ePAR   | fa          | 36,711,977         | 32,891,346         | 89.59             | 163,180        | 157,325         | 96.41                |
| P3 *       | ePAR   | pa          | 149,637,283        | 134,452,533        | 89.85             | 810,574        | 753,664         | 92.98                |
| F3 *       | ePAR   | fa          | 84,790,584         | 75,859,154         | 89.47             | 345,952        | 320,717         | 92.71                |
| P4 *       | ePAR   | pa          | 85,253,719         | 76,863,868         | 90.16             | 355,542        | 347,721         | 97.80                |
| F4 *       | ePAR   | fa          | 85,659,925         | 77,183,601         | 90.10             | 343,893        | 335,654         | 97.60                |
| P5 *       | ePAR   | pa          | 26,747,753         | 24,051,513         | 89.92             | 118,408        | 117,148         | 98.94                |
| F5 *       | ePAR   | fa          | 85,472,838         | 76,732,964         | 89.77             | 346,425        | 321,536         | 92.82                |
| P6 *       | ePAR   | pa          | 113,795,421        | 101,829,085        | 89.48             | 476,539        | 457,852         | 96.08                |
| F6 *       | ePAR   | fa          | 75,312,769         | 66,838,973         | 88.75             | 300,658        | 276,314         | 91.90                |
| 6689_01    | ePAR   |             | 83,255,363         | 75,124,261         | 90.23             | 333,594        | 321,682         | 96.43                |
| 333        | ePAR   |             | 72,691,290         | 64,267,808         | 88.41             | 320,268        | 309,115         | 96.52                |
|            |        | <i>min</i>  | <b>26,747,753</b>  | <b>24,051,513</b>  | <b>88.41</b>      | <b>118,408</b> | <b>117,148</b>  | <b>87.65</b>         |
|            |        | <i>max</i>  | <b>149,637,283</b> | <b>134,452,533</b> | <b>90.24</b>      | <b>810,574</b> | <b>753,664</b>  | <b>98.94</b>         |
|            |        | <i>mean</i> | <b>77,252,336</b>  | <b>69,342,818</b>  | <b>89.75</b>      | <b>327,408</b> | <b>308,842</b>  | <b>94.46</b>         |

\* from Mensah *et al.* 2014 PLoS genetics, 10: e1004578.  
da = daughter, fa=father, mo=mother, br=brother, pa=patient
