# Supplementary material for: Recombination hotspots in an extended human pseudoautosomal domain predicted from double-strand break maps and characterized by sperm-based crossover analysis
Source: PubMed Central journal article supplement (PMC6193736; doi:10.1371/journal.pgen.1007680), 2018-10-08
Supplement: pgen.1007680.s005.pdf [file pgen.1007680.s005.pdf]

## S2\_Table: Comparison of ePAR haplotype structures with phase-known X chromosomes – SNP markers

| SNP ID<br>(chr X) | hg19 (chr X) | SNP ID      | hg19 (chr X) | SNP ID      | hg19 (chr X) | SNP ID      | hg19 (chr X) | SNP ID      | hg19    |
|-------------------|--------------|-------------|--------------|-------------|--------------|-------------|--------------|-------------|---------|
| rs28579419        | 2699645      | rs3111182   | 2714277      | rs5982871   | 2739032      | rs142753289 | 2772820      | rs5939380   | 2784051 |
| rs60075487        | 2699676      | rs5939326   | 2714531      | rs6641652   | 2740681      | rs4892899   | 2773521      | rs200259684 | 2784879 |
| rs2306737         | 2699968      | rs141584360 | 2714584      | rs3828931   | 2740891      | rs4892900   | 2773780      | rs6642050   | 2785428 |
| rs2306736         | 2700027      | rs4484858   | 2715425      | rs3828930   | 2740892      | rs5939133   | 2774700      | rs62582323  | 2785712 |
| rs5939319         | 2700157      | rs2316291   | 2717033      | rs73190969  | 2741078      | rs4993468   | 2774793      | rs62582325  | 2785737 |
| rs5939320         | 2700202      | rs3111189   | 2717067      | rs141205366 | 2741322      | rs7473759   | 2774990      | rs62582327  | 2785740 |
| rs5982852         | 2702047      | rs5939327   | 2717234      | rs185534666 | 2741406      | rs7473760   | 2775002      | rs62582329  | 2785749 |
| rs5982853         | 2702143      | rs3111190   | 2717538      | rs6641656   | 2748292      | rs148979483 | 2775148      | rs190308716 | 2785936 |
| rs111595179       | 2702339      | rs5939329   | 2718135      | rs5939348   | 2748421      | rs59393192  | 2775211      | rs12558009  | 2786029 |
| rs5982854         | 2702568      | rs752782071 | 2718189      | rs5939350   | 2749521      | rs141405035 | 2775259      | rs6642051   | 2786038 |
| rs73433431        | 2702698      | rs11152547  | 2724389      | rs5939351   | 2750122      | rs9781871   | 2775356      | rs73435434  | 2792662 |
| rs5982855         | 2702799      | rs7058222   | 2724429      | rs2873118   | 2750768      | rs905375    | 2775601      | rs75069845  | 2792838 |
| rs5982856         | 2702946      | rs7062707   | 2724448      | rs6641657   | 2751904      | rs5939134   | 2778322      | rs6567674   | 2794461 |
| rs5982854         | 2703354      | rs5939335   | 2725660      | rs12396748  | 2752070      | rs2316285   | 2778433      | rs7065465   | 2794858 |
| rs1486175         | 2703391      | rs189287974 | 2727265      | rs12387509  | 2752333      | rs1905995   | 2778526      | rs5982604   | 2797795 |
| rs1419931         | 2703633      | rs6567647   | 2728221      | rs5982590   | 2752707      | rs5939374   | 2778546      | rs5982605   | 2797895 |
| rs6641645         | 2704335      | rs12010750  | 2728516      | rs113160927 | 2753182      | rs1905996   | 2778587      | rs12388511  | 2798480 |
| rs6642018         | 2704808      | rs141066369 | 2728872      | rs7057656   | 2753527      | rs5939375   | 2778715      | rs1269      | 2800624 |
| rs6642019         | 2704989      | rs5982866   | 2729011      | rs138650022 | 2753713      | rs5982900   | 2778796      | rs1268      | 2800677 |
| rs113922957       | 2705011      | rs5939336   | 2729281      | rs7892329   | 2754793      | rs1905997   | 2778832      | rs9355      | 2800788 |
| rs112589751       | 2705265      | rs5982867   | 2729346      | rs5982876   | 2756413      | rs10871869  | 2778982      | rs12844789  | 2801000 |
| rs5982858         | 2705462      | rs12851007  | 2732634      | rs5982877   | 2757233      | rs10871870  | 2778996      | rs12859113  | 2801026 |
| rs5982859         | 2706340      | rs5939124   | 2733109      | rs5982878   | 2757399      | rs11152551  | 2779171      | rs211664    | 2801155 |
| rs5982860         | 2706487      | rs5939125   | 2733210      | rs5982879   | 2757754      | rs11152552  | 2779211      | rs60445074  | 2801158 |
| rs5939117         | 2707060      | rs3672      | 2733641      | rs4892896   | 2757783      | rs10871871  | 2779330      | rs12391908  | 2802182 |
| rs5939324         | 2707142      | rs3671      | 2733668      | rs11152548  | 2759615      | rs2306735   | 2779570      | rs62582348  | 2802356 |
| rs311166          | 2707978      | rs5939340   | 2734838      | rs62582317  | 2767637      | rs4892901   | 2780265      | rs211665    | 2802368 |
| rs145903180       | 2709600      | rs5939341   | 2734930      | rs145268586 | 2767957      | rs4892902   | 2780319      | rs1637783   | 2802396 |
| rs112470161       | 2710504      | rs140285516 | 2735299      | rs2316287   | 2768611      | rs5939135   | 2780533      | rs1637784   | 2802397 |
| rs311167          | 2710506      | rs5939342   | 2735539      | rs5939358   | 2768713      | rs6642045   | 2780747      | rs211668    | 2802726 |
| rs311168          | 2710840      | rs5939343   | 2735621      | rs9320050   | 2768851      | rs6642046   | 2780826      | rs76495523  | 2802915 |
| rs311169          | 2710995      | rs5939344   | 2735741      | rs9320051   | 2768864      | rs6642047   | 2780829      | rs59272600  | 2802991 |
| rs311170          | 2711429      | rs146579399 | 2735895      | rs6641662   | 2769103      | rs149865569 | 2780978      | rs5939140   | 2803276 |
| rs4892892         | 2711722      | rs6642031   | 2735926      | rs62582319  | 2769284      | rs12391316  | 2781220      | rs56019734  | 2803303 |
| rs2291380         | 2712283      | rs5939126   | 2736196      | rs5939360   | 2769334      | rs7057853   | 2781260      | rs5939141   | 2803387 |
| rs311174          | 2713012      | rs1809566   | 2736301      | rs7058332   | 2771314      | rs55776760  | 2781357      | rs5939142   | 2803469 |
| rs1639329         | 2713069      | rs2316290   | 2736503      | rs5939361   | 2771315      | rs5939376   | 2782305      | rs5939143   | 2803688 |
| rs1639330         | 2713073      | rs6567653   | 2737097      | rs5939362   | 2771540      | rs11152553  | 2782384      | rs5939386   | 2803689 |
| rs311175          | 2713089      | rs2018620   | 2737149      | rs4892898   | 2772275      | rs5939377   | 2782455      | rs5018317   | 2804185 |
| rs7061550         | 2713211      | rs5982869   | 2737194      | rs7879795   | 2772660      | rs5939136   | 2782633      | rs211654    | 2805786 |
| rs311177          | 2713698      | rs901321    | 2737282      | rs7882856   | 2772694      | rs5939378   | 2783107      | rs211655    | 2806196 |
| rs311179          | 2713763      | rs5939128   | 2737851      | rs6567664   | 2772772      | rs5939137   | 2783555      |             |         |
| rs311180          | 2713807      | rs5982870   | 2738809      | rs6567665   | 2772792      | rs5939379   | 2783776      |             |         |

NOTE: To lift over to hg38 add 81959 to hg19 co-ordinate
