# Supplementary material for: Recombination hotspots in an extended human pseudoautosomal domain predicted from double-strand break maps and characterized by sperm-based crossover analysis
Source: PubMed Central journal article supplement (PMC6193736; doi:10.1371/journal.pgen.1007680), 2018-10-08
Supplement: pgen.1007680.s006.pdf [file pgen.1007680.s006.pdf]

S3\_Table: Comparison of ePAR haplotype structures with phase-known X chromosomes - summary data

|                                          | block<br>A | block<br>B | block<br>C | block<br>D | block<br>E | block<br>F | block<br>G | block<br>H | block<br>I |
|------------------------------------------|------------|------------|------------|------------|------------|------------|------------|------------|------------|
| no. SNPs:                                | 6          | 47         | 11         | 29         | 19         | 29         | 41         | 7          |            |
| hg19 (chr X) start:                      | 2699645    | 2702047    | 2724389    | 2732634    | 2748292    | 2767637    | 2778322    | 2792662    | 2800000    |
| hg19 (chr X) end:                        | 2700202    | 2718189    | 2729346    | 2741406    | 2759615    | 2775601    | 2786038    | 2798480    | 2806000    |
| <b>no. different haplotypes amongst:</b> |            |            |            |            |            |            |            |            |            |
| I2a ePAR (n=10)                          | 2          | 7          | 2          | 3          | 1          | 4          | 4          | 2          |            |
| R1b ePAR (n=1)                           | 1          | 1          | 1          | 1          | 1          | 1          | 1          | 1          |            |
| CEU (n=49)                               | 5          | 20         | 5          | 9          | 4          | 13         | 11         | 6          |            |
| GBR (n=46)                               | 6          | 17         | 5          | 6          | 4          | 11         | 9          | 5          |            |
| <b>no. unique haplotypes amongst:</b>    |            |            |            |            |            |            |            |            |            |
| I2a ePAR (n=10)                          | 0          | 4          | 0          | 2          | 0          | 2          | 1          | 0          |            |
| R1b ePAR (n=1)                           | 0          | 1          | 0          | 0          | 0          | 1          | 0          | 0          |            |
| CEU (n=49)                               | 0          | 12         | 2          | 5          | 0          | 6          | 4          | 3          |            |
| GBR (n=46)                               | 1          | 9          | 2          | 2          | 1          | 5          | 2          | 5          |            |
| <b>% I2a ePAR shared with:</b>           |            |            |            |            |            |            |            |            |            |
| CEU                                      | 100        | 54.5       | 100        | 81.8       | 100        | 72.7       | 90.9       | 100        | 90.9       |
| GBR                                      | 100        | 54.5       | 100        | 81.8       | 100        | 72.7       | 90.9       | 100        | 90.9       |
| <b>% CEU haplotypes shared with:</b>     |            |            |            |            |            |            |            |            |            |
| all ePARs                                | 69.4       | 49.0       | 89.8       | 55.1       | 67.3       | 16.3       | 69.4       | 55.1       | 40.0       |
| GBR                                      | 100        | 71.4       | 91.8       | 89.8       | 100        | 81.6       | 91.8       | 83.7       | 70.0       |
| <b>% GBR haplotypes shared with:</b>     |            |            |            |            |            |            |            |            |            |
| all ePARs                                | 73.9       | 45.7       | 89.1       | 45.7       | 60.9       | 17.4       | 50.0       | 80.4       | 60.0       |
| CEU                                      | 97.8       | 76.1       | 91.3       | 93.5       | 97.8       | 84.8       | 84.8       | 91.3       | 80.0       |

Adjacent blocks of markers are separated by clusters of mapped meiotic DSBs as reported in Pratto *et al.* 2014 *Science* 346: 1256442.

NOTE: To lift over to hg38 add 81959 to hg19 co-ordinate
