# Supplementary material for: Recombination hotspots in an extended human pseudoautosomal domain predicted from double-strand break maps and characterized by sperm-based crossover analysis
Source: PubMed Central journal article supplement (PMC6193736; doi:10.1371/journal.pgen.1007680), 2018-10-08
Supplement: pgen.1007680.s007.pdf [file pgen.1007680.s007.pdf]

S4\_Table. PowerPlex Y-23 STR haplotypes for haplogroup I2a carriers of ePAR.

|           | DYS393 | DYS390 | DYS19 | DYS391 | DYS385a | DYS385b | DYS439 | DYS389I | DYS392 | DYS389II | DYS458 | DYS437 | DYS448 | YGATAH4 | DYS456 | DYS576 | DYS570 | DYS438 | DYS481 | DYS549 | DYS533 | DYS635 | DYS643 |
|-----------|--------|--------|-------|--------|---------|---------|--------|---------|--------|----------|--------|--------|--------|---------|--------|--------|--------|--------|--------|--------|--------|--------|--------|
| NA12146   | 13     | 22     | 15    | 10     | 12      | 15      | 11     | 13      | 11     | 29       | 18     | 14     | 17     | 11      | 14     | 18     | 17     | 10     | 27     | 12     | 13     | 21     | 12     |
| man 20    | 13     | 22     | 15    | 10     | 12      | 15      | 11     | 14      | 11     | 31       | 18     | 14     | 18     | 11      | 14     | 17     | 17     | 10     | 28     | 12     | 13     | 21     | 12     |
| 6689_01   | 13     | 23     | 15    | 10     | 12      | 15      | 11     | 14      | 11     | 30       | 19     | 14     | 18     | 11      | 14     | 17     | 18     | 10     | 28     | 12     | 13     | 21     | 12     |
| 333       | 13     | 23     | 15    | 10     | 12      | 15      | 11     | 14      | 11     | 30       | 18     | 14     | 18     | 11      | 14     | 17     | 17     | 10     | 27     | 12     | 13     | 21     | 12     |
| man 53    | 13     | 23     | 16    | 10     | 12      | 15      | 11     | 14      | 11     | 30       | 17     | 14     | 18     | 11      | 14     | 17     | 19     | 10     | 27     | 12     | 13     | 21     | 12     |
| P2/F2*    | 13     | 23     | 15    | 10     | 12      | 15      | 12     | 14      | 12     | 30       | 18     | 14     | 19     | 11      | 14     | 17     | 17     | 10     | 27     | 12     | 12     | 21     | 12     |
| P3/F3*    | 13     | 23     | 15    | 10     | 12      | 15      | 12     | 14      | 11     | 30       | 18     | 14     | 19     | 11      | 14     | 17     | 17     | 10     | 27     | 12     | 12     | 21     | 12     |
| P6/F6*    | 13     | 23     | 15    | 10     | 12      | 15      | 12     | 14      | 11     | 30       | 18     | 14     | 18     | 10      | 14     | 17     | 17     | 10     | 27     | 11     | 12     | 21     | 12     |
| P1/F1/B1* | 13     | 23     | 15    | 10     | 15      | 16      | 11     | 12      | 11     | 28       | 16     | 14     | 20     | 11      | 14     | 19     | 17     | 10     | 23     | 13     | 12     | 21     | 12     |
| P5/F5*    | 14     | 25     | 16    | 10     | 11      | 14      | 13     | 14      | 11     | 30       | 18     | 16     | 21     | 12      | 15     | 18     | 18     | 10     | 25     | 11     | 12     | 21     | 12     |
| P14*      | 13     | 25     | 15    | 10     | 13      | 16      | 12     | 14      | 11     | 30       | 18     | 14     | 18     | 11      | 14     | 17     | 19     | 10     | 26     | 12     | 13     | 21     | 12     |
| P15*      | 13     | 22     | 15    | 10     | 12      | 15      | 11     | 13      | 11     | 29       | 19     | 14     | 18     | 11      | 13     | 18     | 19     | 10     | 27     | 12     | 12     | 21     | 12     |
| P7*       | 13     | 23     | 15    | 11     | 12      | 15      | 12     | 14      | 11     | 30       | 18     | 14     | 18     | 11      | 14     | 17     | 17     | 10     | 27     | 12     | 13     | 21     | 12     |
| P8*       | 12     | 23     | 15    | 10     | 12      | 14      | 12     | 14      | 11     | 30       | 18     | 14     | 18     | 11      | 14     | 18     | 17     | 10     | 27     | 12     | 13     | 21     | 12     |
| P9*       | 13     | 23     | 16    | 10     | 12      | 15      | 12     | 14      | 11     | 30       | 18     | 14     | 19     | 11      | 14     | 17     | 17     | 10     | 27     | 12     | 12     | 21     | 12     |
| P11*      | 13     | 23     | 16    | 10     | 12      | 15      | 13     | 14      | 11     | 30       | 18     | 14     | 18     | 11      | 14     | 17     | 17     | 10     | 27     | 12     | 13     | 22     | 12     |
| P12*      | 13     | 23     | 15    | 10     | 12      | 15      | 12     | 14      | 11     | 30       | 19     | 14     | 18     | 11      | 14     | 16     | 16     | 10     | 25     | 12     | 13     | 21     | 12     |
| P13*      | 13     | 24     | 15    | 11     | 12      | 15      | 12     | 14      | 11     | 30       | 18     | 14     | 18     | 11      | 14     | 17     | 17     | 10     | 27     | 12     | 13     | 21     | 12     |
| P10*      | 13     | 23     | 15    | 11     | 11      | 14      | 12     | 13      | 11     | 29       | 18     | 16     | 20     | 11      | 14     | 19     | 17     | 10     | 24     | 11     | 14     | 21     | 15     |
| 5D4       | 13     | 23     | 15    | 10     | 12      | 15      | 12     | 14      | 11     | 30       | 19     | 14     | 18     | 11      | 14     | 17     | 18     | 10     | 27     | 11     | 12     | 21     | 13     |
| 8F5       | 13     | 23     | 15    | 10     | 12      | 16      | 13     | 13      | 11     | 29       | 19     | 14     | 18     | 10      | 14     | 17     | 18     | 10     | 27     | 12     | 13     | 20     | 11     |
| 9D5       | 13     | 23     | 15    | 10     | 12      | 15      | 12     | 14      | 11     | 30       | 19     | 14     | 18     | 11      | 14     | 16     | 17     | 10     | 27     | 12     | 13     | 21     | 12     |

\* data from Mensah *et al.* 2014 PLoS genetics, 10: e1004578.
