# Supplementary material for: Recombination hotspots in an extended human pseudoautosomal domain predicted from double-strand break maps and characterized by sperm-based crossover analysis
Source: PubMed Central journal article supplement (PMC6193736; doi:10.1371/journal.pgen.1007680), 2018-10-08
Supplement: pgen.1007680.s008.pdf [file pgen.1007680.s008.pdf]

S5\_Table: Y-chromosome haplogrouping using a SNaPshot® single-base extension assay

A) Primer sequences and annealing temperature for haplogroup-I2a multiplex

| Primer name | 5' to 3' sequence     | Location of 5' nt in hg19 (chrY) | Location of 5' nt in hg38 (chrY) | % in primer mix | T <sub>m</sub> (°C) |
|-------------|-----------------------|----------------------------------|----------------------------------|-----------------|---------------------|
| I2F1        | CTAGTGGCTGCATAAGGTAG  | 16638691                         | 14526811                         | 6.12            | 59                  |
| I2R1        | GTCAGTCAAAGCTCCTGTC   | 16638914                         | 14527034                         |                 |                     |
| I2F2        | GGAGTCACATCACTTAGGTG  | 7879298                          | 8011257                          | 8.16            |                     |
| I2R2        | CTTTTCTAGGACCAGACCAC  | 7879507                          | 8011466                          |                 |                     |
| I2F3        | GAGACAAGCATAGTGATAGGG | 14491650                         | 12379847                         | 4.08            |                     |
| I2R3        | GGCATGCCCAACTCCTCTTC  | 14491815                         | 12380012                         |                 |                     |
| I2F4/3      | CTGAAGCCTGGGTGTGACTTG | 6873997                          | 7005956                          | 6.12            |                     |
| I2R4/2      | GTTCTGGGCTGATATTTCTGC | 6874152                          | 7006111                          |                 |                     |
| I2F5        | GGGGTGTAGTTTAGACATC   | 19126608                         | 17014728                         | 14.29           |                     |
| I2R5        | GGCTGAGATTCTATCCTGAG  | 19126738                         | 17014858                         |                 |                     |
| I2F6        | CAGCACTTGTCTTCTGTTTGC | 21778604                         | 19616718                         | 10.21           |                     |
| I2R6        | GTGGAGATGGTAAGTTGTCC  | 21778760                         | 19616874                         |                 |                     |
| I2F8        | GGTGATTGATAGCTAGACAGC | 14487267                         | 12366536                         | 14.29           |                     |
| I2R8        | GGATGACAGACTCTATGTG   | 14487496                         | 12366765                         |                 |                     |
| I2F9        | CATGGGGAACAGGCAGTGAA  | 8846879                          | 8978838                          | 8.16            |                     |
| I2R9        | GAACTTCCTTCCTCTCCAAC  | 8847138                          | 8979097                          |                 |                     |
| I2F10/2     | CTATCAGGTAGGCAGAGTG   | 2887182                          | 3019141                          | 28.57           |                     |
| I2R10       | TCCTAAAGAGTGCAGAGCTG  | 2887454                          | 3019413                          |                 |                     |

**B) Extension primer sequences for haplogroup-I2a SNaPshot® assay**

| SNP        | hg19<br>(chrY) | hg38<br>(chrY) | change | YCC Hg             | ISOGG 2018<br>Hg | 5' to 3' primer sequence                                                           | % in<br>mix |
|------------|----------------|----------------|--------|--------------------|------------------|------------------------------------------------------------------------------------|-------------|
| M438, P215 | 16,638,804     | 14,526,924     | A to G | I2                 | I2               | AAAGCCTGGAATGTAGACTAATGGT                                                          | 5.36        |
| S238, L460 | 7,879,415      | 8,011,374      | A to C | approx. hg: I-P215 | I2a              | AAAAAAAAAAAAAAAAAAAAAAAAAAAAAAAAAAAAAAAA<br>AAAAAACTTGGCTCTGCCTACAGAG              | 14.29       |
| P37        | 14,491,684     | 12,379,881     | T to C | D2 and I2a         | I2a1             | AAAAAAAAAAAAAGATAGGGTGGGATTGGTTCA                                                  | 5.36        |
| CTS595     | 6,874,115      | 7,006,074      | C to T | I2a-P37.2          | I2a1a            | AAAAAAAAAAAAAAAAAAAAAAAAAAAACTGCCAACAAATTA<br>AATACC                               | 5.36        |
| S21825     | 19,126,655     | 17,014,775     | G to A | <i>not listed</i>  | I2a1a2           | AAAAAAAAAAAAAAAAAAAAAATGGACTTAGGGAACTTC<br>C                                       | 10.71       |
| L1286      | 21,778,662     | 19,616,776     | G to A | approx. hg: I-L233 | I2a1a2a          | AAAAAAAAAAAAAAAAAAAAAAAAAAAAAAAAAAAAAAAA<br>AAAAAAAAAAAAAGTCTGAATGTCTCAAACCTC      | 7.14        |
| L233       | 14,487,362     | 12,366,631     | G to A | I2a3               | I2a1a2a1a        | AAAAAAAAAAAAAAAAAAAAAAAAAAAAAAAAAAAAAGCTGAT<br>TGATAGCTAGAT                        | 16.07       |
| A417       | 8,846,964      | 8,978,923      | T to C | I-A417             | I2a1a2a1a1a      | AAAAAAAAAAAAAAAAAAAAAAAAAAAAAAAAAAAAAAAA<br>TTTTTTATACCAAAGCTT                     | 14.29       |
| L1294      | 2,887,401      | 3,019,360      | T to C | I2a-S21825         | I2a1a2b          | AAAAAAAAAAAAAAAAAAAAAAAAAAAAAAAAAAAAAAAA<br>AAAAAAAAAAAAAAAAAAAAAATTAGCCATTTTTTGTG | 21.42       |
