# Supplementary material for: Recombination hotspots in an extended human pseudoautosomal domain predicted from double-strand break maps and characterized by sperm-based crossover analysis
Source: PubMed Central journal article supplement (PMC6193736; doi:10.1371/journal.pgen.1007680), 2018-10-08
Supplement: pgen.1007680.s009.pdf [file pgen.1007680.s009.pdf]

S6\_Table: **Primer sequences for sperm recombination analysis**

| Primer name | 5' to 3' sequence         | Location of 5' nt in hg19 (chrX) | Location of 5' nt in hg38 (chrX) |
|-------------|---------------------------|----------------------------------|----------------------------------|
| X25/56F     | GGAAGGTATATAAGCTCTGG      | 2699568                          | 2781527                          |
| 9.5F C/A    | GATAAATGCACACACATATC/A    | 2699536                          | 2781495                          |
| X9.6F G/T   | CCTTCTCCCTGTAACAGG/T      | 2699628                          | 2781587                          |
| 9.9F A/G    | TTTTTAACCCAGACAATGGCA/G   | 2699949                          | 2781908                          |
| X9980F      | ACACCGTGGGCAGCAAATCA      | 2699979                          | 2781938                          |
| X11131F     | GGACACTTTGCATTATCATC      | 2701130                          | 2783089                          |
| X2.77R      | AACATAGCCATGATCCGCAG      | 2702217                          | 2784176                          |
| X12654F     | GCGAGATCCTTTAAGATGGG      | 2702653                          | 2784612                          |
| X13778R     | CTGGGCAAGAACACTGGTTA      | 2703777                          | 2785736                          |
| X14598R     | GTGGCTCACACCTGTAATCCC     | 2704597                          | 2786556                          |
| 14.6R T/C   | TTACTTTCAAGACAACATGA/G    | 2704628                          | 2786587                          |
| X14763R     | TTCTTAAAGGCCCCATCTCC      | 2704762                          | 2786721                          |
| 14.8R T/C   | TTATTAGGATACTAGTCCTA/G    | 2704827                          | 2786786                          |
| 15.0R C/T   | GCTGTCACAGAACACCATAGA/A   | 2705030                          | 2786989                          |
| 15.2R C/T   | CTTAGTCCATTTCCAGGCTG/A    | 2705283                          | 2787242                          |
| X15423R     | AACCTCCAACCTGCATTGATTC    | 2705422                          | 2787381                          |
| 93.1F A/G   | CCATGCCTGGCTATTA AAAA/A/G | 2783088                          | 2865047                          |
| X93213F     | GAGGGATTTCCACGGATTG       | 2783212                          | 2865171                          |
| 93.5F G/T   | GATATGTAGCTTCGTGTTTGT/G   | 2783535                          | 2865494                          |
| X94556F     | GAGACTAGGAAAGGTGGG        | 2784555                          | 2866514                          |
| X95211F     | GAGCGTACTTTGTTTAGGGT      | 2785210                          | 2867169                          |
| X95737R     | CTCCATTCCTGAATCTCTC       | 2785736                          | 2867695                          |
| X98092R     | ACTAGAAGACAAAACGCTGG      | 2788091                          | 2870050                          |
| X98641R     | GTAGACTGAAGTATGGGGAG      | 2788640                          | 2870599                          |
| X99925F     | CACCACCTCCAGCAGTAATAA     | 2789924                          | 2871883                          |
| X100924R    | GTCCTGGATTTGAATACTG       | 2790923                          | 2872882                          |
| 102.6R A/G  | CAGTGGCCTACACAGATAT/C     | 2792680                          | 2874639                          |
| X102760R    | TCCAGTTCATTCTCCTAATC      | 2792759                          | 2874718                          |
| 102.8R A/G  | ATCCCAGAGATTTTGAGTGAT/C   | 2792858                          | 2874817                          |

The alternative 3' nucleotides of allele-specific primers (ASPs) are shown in red.
