# Supplementary material for: Recombination hotspots in an extended human pseudoautosomal domain predicted from double-strand break maps and characterized by sperm-based crossover analysis
Source: PubMed Central journal article supplement (PMC6193736; doi:10.1371/journal.pgen.1007680), 2018-10-08
Supplement: pgen.1007680.s010.pdf [file pgen.1007680.s010.pdf]

**S7\_Table: Primer combinations and annealing temperatures used for sperm recombination analysis**

| Assay    | Man | Primer combination                       | T <sub>m</sub> (°C) | Purpose                                        |
|----------|-----|------------------------------------------|---------------------|------------------------------------------------|
| Distal   | 20  | 9.5F C + X2.77R<br>9.5F A + X2.77R       | 58<br>56            | phasing of 5' selector sites                   |
| Distal   | 20  | X11131F + 14.8R C<br>X11131F + 14.8R T   | 54<br>54            | phasing of 3' selector sites                   |
| Distal   | 20  | 9.5F C + 14.8R C                         | 57-55               | crossover detection (1° PCR) orientation A     |
| Distal   | 20  | X9.6F G + 14.6R C                        | 54                  | crossover detection (2° PCR) orientation A     |
| Distal   | 20  | 9.5F A + 14.8R T                         | 56-54               | crossover detection (1° PCR) orientation B     |
| Distal   | 20  | X9.6F T + 14.6R T                        | 54                  | crossover detection (2° PCR) orientation B     |
| Distal   | 20  | X9980F + X14598R                         | 64                  | crossover detection (3° PCR) orientation A & B |
| Distal   | 53  | 9.5F C + X13778R<br>9.5F A + X13778R     | 59<br>58,57         | phasing of 5' selector sites                   |
| Distal   | 53  | X12654F + 15.2R C<br>X12654F + 15.2R T   | 59<br>59            | phasing of 3' selector sites                   |
| Distal   | 53  | 9.5F A + X15423R                         | 56                  | crossover detection (1° PCR #1) orientation A  |
| Distal   | 53  | X25/56F + 15.2R C                        | 58                  | crossover detection (1° PCR #2) orientation A  |
| Distal   | 53  | 9.9F G + 15.0R C                         | 61                  | crossover detection (2° PCR) orientation A     |
| Distal   | 53  | 9.5F C + X15423R                         | 56                  | crossover detection (1° PCR #1) orientation B  |
| Distal   | 53  | X25/56F + 15.2R T                        | 58                  | crossover detection (1° PCR #2) orientation B  |
| Distal   | 53  | 9.9F A + 15.0R T                         | 61                  | crossover detection (2° PCR) orientation B     |
| Distal   | 53  | X9980F + X13778R                         | 61                  | crossover detection (3° PCR) orientation A & B |
| Proximal | 20  | X94556F + 102.8R A<br>X94556F + 102.8R G | 60, 58              | phasing (1° PCR)                               |
| Proximal | 20  | X95211F + X100924R                       | 57                  | phasing (2° PCR 5' amplicon)                   |
| Proximal | 20  | X99925F + X102760R                       | 58                  | phasing (2° PCR 3' amplicon)                   |
| Proximal | 20  | X94556F + 102.8R A                       | 60, 58              | recombinant detection (1° PCR) orientation A   |
| Proximal | 20  | X95211F + 102.6R A                       | 61, 60              | recombinant detection (2° PCR) orientation A   |
| Proximal | 20  | X94556F + 102.8R G                       | 60, 58              | recombinant detection (1° PCR) orientation B   |
| Proximal | 20  | X95211F + 102.6R G                       | 59                  | recombinant detection (2° PCR) orientation B   |
| Proximal | 53  | 93.1F A + X98641R<br>93.1F G + X98641R   | 60-58               | phasing (1° PCR)                               |
| Proximal | 53  | X93213F + X95737R                        | 58                  | phasing (2° PCR 5' amplicon)                   |
| Proximal | 53  | X95211F + X98092R                        | 58                  | phasing (2° PCR 3' amplicon)                   |
| Proximal | 53  | 93.1F A + X98641R                        | 60-58               | recombinant detection (1° PCR) orientation A   |
| Proximal | 53  | 93.5F T + X98092R                        | 62                  | recombinant detection (2° PCR) orientation A   |
| Proximal | 53  | 93.1F G + X98641R                        | 60-58               | recombinant detection (1° PCR) orientation B   |
| Proximal | 53  | 93.5F G + X98092R                        | 62                  | recombinant detection (2° PCR) orientation B   |

For primer details see Table S9.
