# Supplementary material for: Recombination hotspots in an extended human pseudoautosomal domain predicted from double-strand break maps and characterized by sperm-based crossover analysis
Source: PubMed Central journal article supplement (PMC6193736; doi:10.1371/journal.pgen.1007680), 2018-10-08
Supplement: pgen.1007680.s011.pdf [file pgen.1007680.s011.pdf]

S8\_Table: Allele-Specific Oligonucleotide probe (ASO) sequences

| Assay    | Man    | ASO name  | 5' to 3' sequence     | Location of SNP in hg19 (chrX) | Location of SNP in hg38 (chrX) |
|----------|--------|-----------|-----------------------|--------------------------------|--------------------------------|
| Distal   | 20, 53 | 9.5 A/C   | CACACACATATA/CTCCACA  | 2699555                        | 2781514                        |
| Distal   | 53     | 9.9 G/A   | CAGACAATGGCG/AATCTAT  | 2699968                        | 2781927                        |
| Distal   | 53     | 10.0 C/T  | TAGTCACGCC/TGATGAGCT  | 2700027                        | 2781986                        |
| Distal   | 20     | 10.1 G/A  | CGAGAATCCC/AACAGCGG   | 2700157                        | 2782116                        |
| Distal   | 20     | 10.2 A/G  | CTCTTTCTCA/GTCTGGTT   | 2700202                        | 2782161                        |
| Distal   | 20     | 10.6 C/T  | GGAGTGCTGACC/TGGTCAG  | 2700608                        | 2782567                        |
| Distal   | 53     | 10.6a A/G | ACCGGTCA/GGGTTGAAAG   | 2700613                        | 2782572                        |
| Distal   | 20     | 11.0 T/C  | GGTCTGACCTC/TCTTCACT  | 2701073                        | 2783032                        |
| Distal   | 20, 53 | 11.1 C/T  | CAAGTCCTTT/C/TCTCACT  | 2701185                        | 2783144                        |
| Distal   | 53     | 12.1 C/T  | AATCCCAAAC/TACCACCCA  | 2702143                        | 2784102                        |
| Distal   | 53     | 12.3 C/T  | CTTAAATGC/TGTGGCTGG   | 2702339                        | 2784298                        |
| Distal   | 53     | 12.6 T/C  | GAACACTCAGT/CCCCTCCC  | 2702698                        | 2784657                        |
| Distal   | 20     | 13.3 T/C  | GATGAGCTGTT/CGGTGTAC  | 2703391                        | 2785350                        |
| Distal   | 53     | 13.5 G/A  | GGGAGGCAGG/ATCTGACTA  | 2703544                        | 2785503                        |
| Distal   | 20     | 13.6 A/G  | CAATTGAAC/A/GTCAGAACA | 2703633                        | 2785592                        |
| Distal   | 20     | 14.3 C/G  | TCTCACTC/GTATTGCTCAG  | 2704335                        | 2786294                        |
| Distal   | 20     | 14.4 T/C  | CACCACACCT/CGGCTAATT  | 2704469                        | 2786428                        |
| Distal   | 20     | 14.6 T/C  | GTGCCTGTCC/T/CATGTTG  | 2704609                        | 2786568                        |
| Distal   | 20     | 14.8 T/C  | CCGGATCCAA/T/CAGGACTA | 2704808                        | 2786767                        |
| Distal   | 53     | 15.0 T/C  | AGCCACCCAGTT/C/TATGGT | 2705011                        | 2786970                        |
| Distal   | 53     | 15.2 T/C  | CTGTGATAGT/CAGCCTGAA  | 2705265                        | 2787224                        |
| Proximal | 53     | 93.1 A/G  | GCTATTA AAAA/GCATTCTT | 2783107                        | 2865066                        |
| Proximal | 53     | 93.5 T/G  | CGTGT TTGT/GCCGTCCGTG | 2783555                        | 2865514                        |
| Proximal | 53     | 94.0 A/G  | GATGAATGGA/GTAAAGAAA  | 2784051                        | 2866010                        |
| Proximal | 53     | 95.4 T/G  | CAAGGGAGGT/GGAAAACAG  | 2785428                        | 2867387                        |
| Proximal | 20, 53 | 96.0 G/A  | GGAGGCCG/AAAGCAGGAAA  | 2786038                        | 2867997                        |
| Proximal | 53     | 97.4 A/G  | GAGTCGT/A/GCAACATCACT | 2787485                        | 2869444                        |
| Proximal | 20, 53 | 97.8 C/G  | CAGGCTAC/GTCTTGAATTC  | 2787898                        | 2869857                        |
| Proximal | 20     | 99.8 T/G  | CAACAGCTT/GCACCATTG   | 2789848                        | 2871807                        |
| Proximal | 20     | 100.1 T/C | CAGCCTCTT/CTCCAATGAC  | 2790148                        | 2872107                        |
| Proximal | 20     | 102.6 A/G | GTGCAGATCA/GTATCTGTG  | 2792662                        | 2874621                        |
| Proximal | 20     | 102.8 A/G | CAGCTGAC/A/GTCACTCAA  | 2792838                        | 2874797                        |
