# Supplementary material for: Recombination hotspots in an extended human pseudoautosomal domain predicted from double-strand break maps and characterized by sperm-based crossover analysis
Source: PubMed Central journal article supplement (PMC6193736; doi:10.1371/journal.pgen.1007680), 2018-10-08
Supplement: pgen.1007680.s012.pdf [file pgen.1007680.s012.pdf]

S9\_Table: Primer sequences for Ion Torrent sequencing templates

| Primer name | 5' to 3' sequence      | Location of 5' nt in hg19 (chrX) | Location of 5' nt in hg38 (chrX) | T <sub>m</sub> (°C) |
|-------------|------------------------|----------------------------------|----------------------------------|---------------------|
| PAR7500F    | GAAGAGGCTCCTTACTGCTC   | 2697499                          | 2874797                          | 59                  |
| X13778R     | CTGGGCAAGAACACTGGTTA   | 2703777                          | 2779458                          |                     |
| X11629F     | ACACGCACATCCAGATGGAC   | 2701628                          | 2785736                          | 59                  |
| X17586R     | GCCATTGCTTTTACGGAGC    | 2707585                          | 2783587                          |                     |
| X17401F     | CAGGAAAGGTCAACAACGC    | 2707422                          | 2789544                          | 60                  |
| X19951R     | GCCTTTTGAGGAGGAAGAAC   | 2709953                          | 2789381                          |                     |
| X19801F     | ATGCTTGAGTCCCAACAGGC   | 2709822                          | 2791912                          | 64                  |
| X22701R     | CCCCAACCTCAGCTCTCTCA   | 2712741                          | 2791781                          |                     |
| X22451F3    | TGTGGGCGTCCTGCAAAGAG   | 2712438                          | 2794700                          | 64                  |
| X25501R3    | CTCAGAAGACCAGGCACCAG   | 2715545                          | 2794397                          |                     |
| X25151F     | GGGAAGAGGAAGCTTTGGT    | 2715163                          | 2797504                          | 51                  |
| X26301R     | CAACCTACAGAGTGTTTTG    | 2716326                          | 2797122                          |                     |
| X26243F     | CTCAGATCCTCTCCGGTTTG   | 2716242                          | 2798285                          | 59                  |
| X32676R     | GTGTCCCGAATAGCTCCTTA   | 2722675                          | 2798201                          |                     |
| X28523F     | TGTCCGTCATCTTCGTTACC   | 2718522                          | 2804634                          | 59                  |
| X34984R     | GAAATGAAGTCCTCAGGGCA   | 2724983                          | 2800481                          |                     |
| X34801F     | CACACTGTCTGCACTGATGG   | 2724847                          | 2806942                          | 62                  |
| X37251R     | GTTGCATTCCACATCCTGGC   | 2727281                          | 2806806                          |                     |
| X36801F     | CCCCAAGGCTCTTGTGAGTT   | 2726822                          | 2809240                          | 60                  |
| X39401R     | CCACGGATACGATGGGAGAC   | 2729418                          | 2808781                          |                     |
| X38251F     | ATGCATGGAAAGGTGGCTA    | 2728271                          | 2811377                          | 64                  |
| X41101R     | CGTGCTTCCTTCCACCTCAG   | 2731130                          | 2810230                          |                     |
| X40151F     | TTCGTACAGGCGAGTCAGG    | 2730148                          | 2813089                          | 64                  |
| X42851R     | TTAGCACAGGTCCAGCATC    | 2732876                          | 2812107                          |                     |
| X42651F     | TTGCACAAAGAGACTGTGGC   | 2732677                          | 2814835                          | 62                  |
| X45251R     | CTTTCCAAAACCTGGTCTTC   | 2735298                          | 2814636                          |                     |
| X44151F     | ACCTGGGTGACAAGGCTAAC   | 2734155                          | 2817257                          | 62                  |
| X46701R     | CTGGCAGTAGGTCTCCCTAA   | 2736746                          | 2816114                          |                     |
| X45701F     | GTGTGGTGAGGACCATGGATT  | 2735708                          | 2818705                          | 64                  |
| X48501R     | CCTCCCTTTGGTCTACAGCC   | 2738531                          | 2817667                          |                     |
| X48151F     | ATGGCCTCATCTAAGCTGC    | 2738174                          | 2820490                          | 64                  |
| X50701R     | GGGCTGTGTGTAATCAGGG    | 2740714                          | 2820133                          |                     |
| X50351aF    | GTCTCCCTCCCTGTCTGACC   | 2740345                          | 2822673                          | 64                  |
| X52351R     | AGACGTTGGCGAAATTGCAG   | 2742384                          | 2822304                          |                     |
| X51983F     | CACACACCTATCCCAGC      | 2741982                          | 2823941                          | 60                  |
| X54888R     | CTTGGGACAGGTATCGGT     | 2744882                          | 2826841                          |                     |
| X52081F     | AGACCAACACACAGGAAC     | 2742080                          | 2824039                          | 59                  |
| X58093R     | ACAGCGTGGCAGTCTCGAC    | 2748092                          | 2830051                          |                     |
| X56941F     | TTCCGGACAGAGGCCAATCG   | 2746940                          | 2824343                          | 59                  |
| X62830R     | AGCTGCACACATAAGGGCAT   | 2752829                          | 2828899                          |                     |
| X62001F2    | GCTCCTCATAAGCCTCAGGA   | 2752017                          | 2834788                          | 61                  |
| X64351R2    | CACAGCTTCCCTCCTTTGCA   | 2754381                          | 2833976                          |                     |
| X64301F     | GTTTTTAAGGACCCGAGGAGAC | 2754302                          | 2836340                          | 59                  |
| X67251R     | GCAAAATCAGATGATAGGATC  | 2757256                          | 2836261                          |                     |
| X67151F     | AGCTTATGCTATAGGTTGG    | 2757155                          | 2839215                          | 51                  |
| X70051R     | TCATTAGGTAGAATGGATTC   | 2760081                          | 2839114                          |                     |
| X69951F     | CATCAGTCTTGTGCACAGAG   | 2759973                          | 2842040                          | 60                  |
| X72301R     | TCTGAGGACACACTGGTTGG   | 2762309                          | 2841932                          |                     |
| X72181F     | GGAGGCATTTAATATGGTAG   | 2762180                          | 2844268                          | 57                  |
| X78205R     | ACTGCTTCTGTGTGCTCTC    | 2768204                          | 2844139                          |                     |
| X77081F     | CAAGCGTGTATGGAGTGAT    | 2767080                          | 2850163                          | 59                  |
| X83241R     | TGTGTGCAACAGAGACCCTA   | 2773240                          | 2849039                          |                     |
| X83001F     | CCAGGTGCTGTCCAATGTCCG  | 2773030                          | 2855199                          | 64                  |
| X85751R     | GTCGTAGAGCCTTGCTAGC    | 2775804                          | 2854989                          |                     |
| X85751F     | TCTCGTTTCTGCTTGCTTG    | 2775750                          | 2857763                          | 64                  |
| X88551R     | AGCACACTGCAGATACTCCAC  | 2778580                          | 2857709                          |                     |
| X88001aF    | CTTCATCTGTGGTGGACGGTC  | 2778014                          | 2860539                          | 64                  |
| X90651aR    | ACTCGGCCTCAGCAGACACC   | 2780678                          | 2859973                          |                     |
| X89501F     | AGCAGGTGAATTGAGGAGAC   | 2779505                          | 2862637                          | 62                  |
| X92151R     | GGCTAGGAGTTTGAGCATTC   | 2782159                          | 2861464                          |                     |
| X92028F     | GAGTATCCAAGAATGCTGTG   | 2782027                          | 2864118                          | 59                  |
| X98092R     | ACTAGAAGACA AAAACGCTGG | 2788091                          | 2863986                          |                     |
| X97080F     | GCTGTCCATACGGTATCTGA   | 2787079                          | 2870050                          | 59                  |
| X103595R    | TGAGTGAATGTGAGGAGGTG   | 2793594                          | 2869038                          |                     |
| X104167F    | GGATAAGGAATCTGGCTGTC   | 2794166                          | 2875553                          | 57                  |
| X110158R    | TTTCCCGTCTCATAAACTG    | 2800157                          | 2876125                          |                     |
| X109074F    | CCACTGACTGCTTCCCTAG    | 2799073                          | 2882116                          | 59                  |
| X115091R    | TAAGACCTTGAGAAAATGCC   | 2805090                          | 2881032                          |                     |
| X113156F    | GCACGAAACAGGTCCTAGTG   | 2803155                          | 2887049                          | 60                  |
| X116806R    | TGGCCTGAACTGTACTCTTGA  | 2806805                          | 2885114                          |                     |
| MX115182F   | AAATGAACGCTAAGCCCCAC   | 2805181                          | 2888764                          | 60                  |
| Xdup118516R | CGTCTCCAGTAACATTGCCA   | 2808515                          | 2887140                          |                     |
